# Supplementary figures and images for: AKT isoforms have distinct hippocampal expression and roles in synaptic plasticity
Source: eLife journal article supplement (doi:10.7554/elife.30640), 2017-11-27

Figure 2 – figure supplement 1

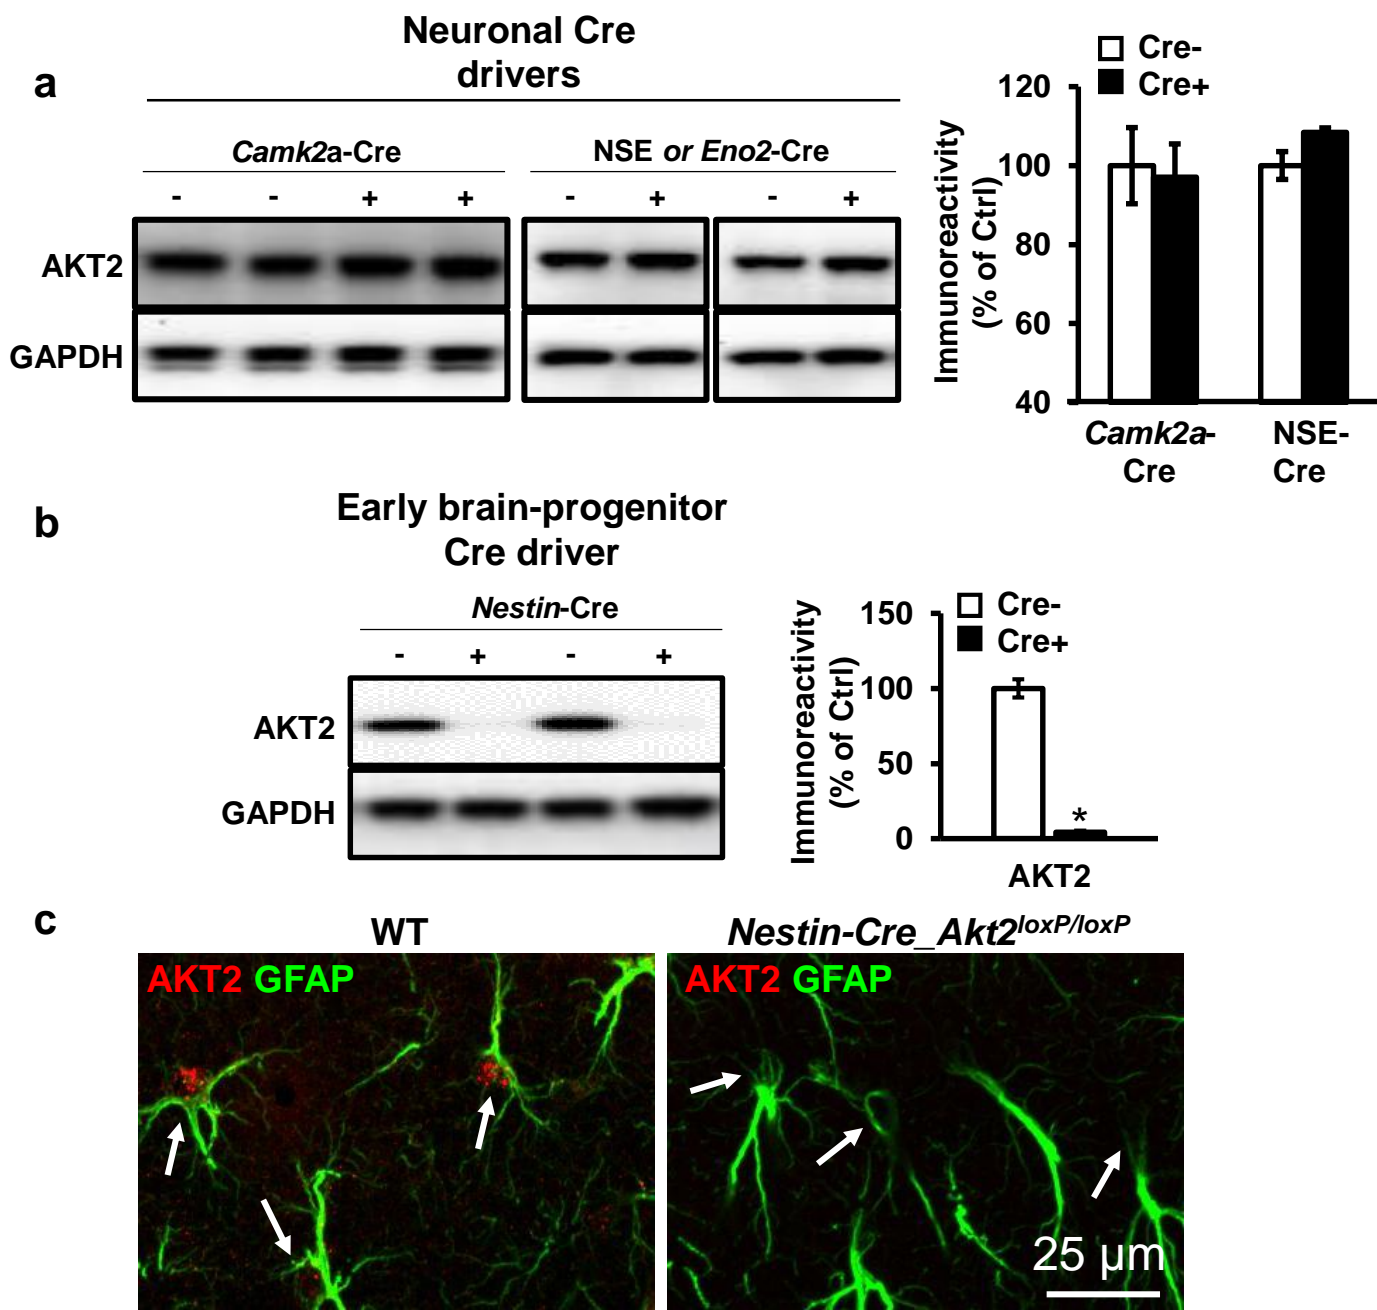

Supplement: supp [file elife-30640-supp-v1.zip]

Figure 4 – figure supplement 2

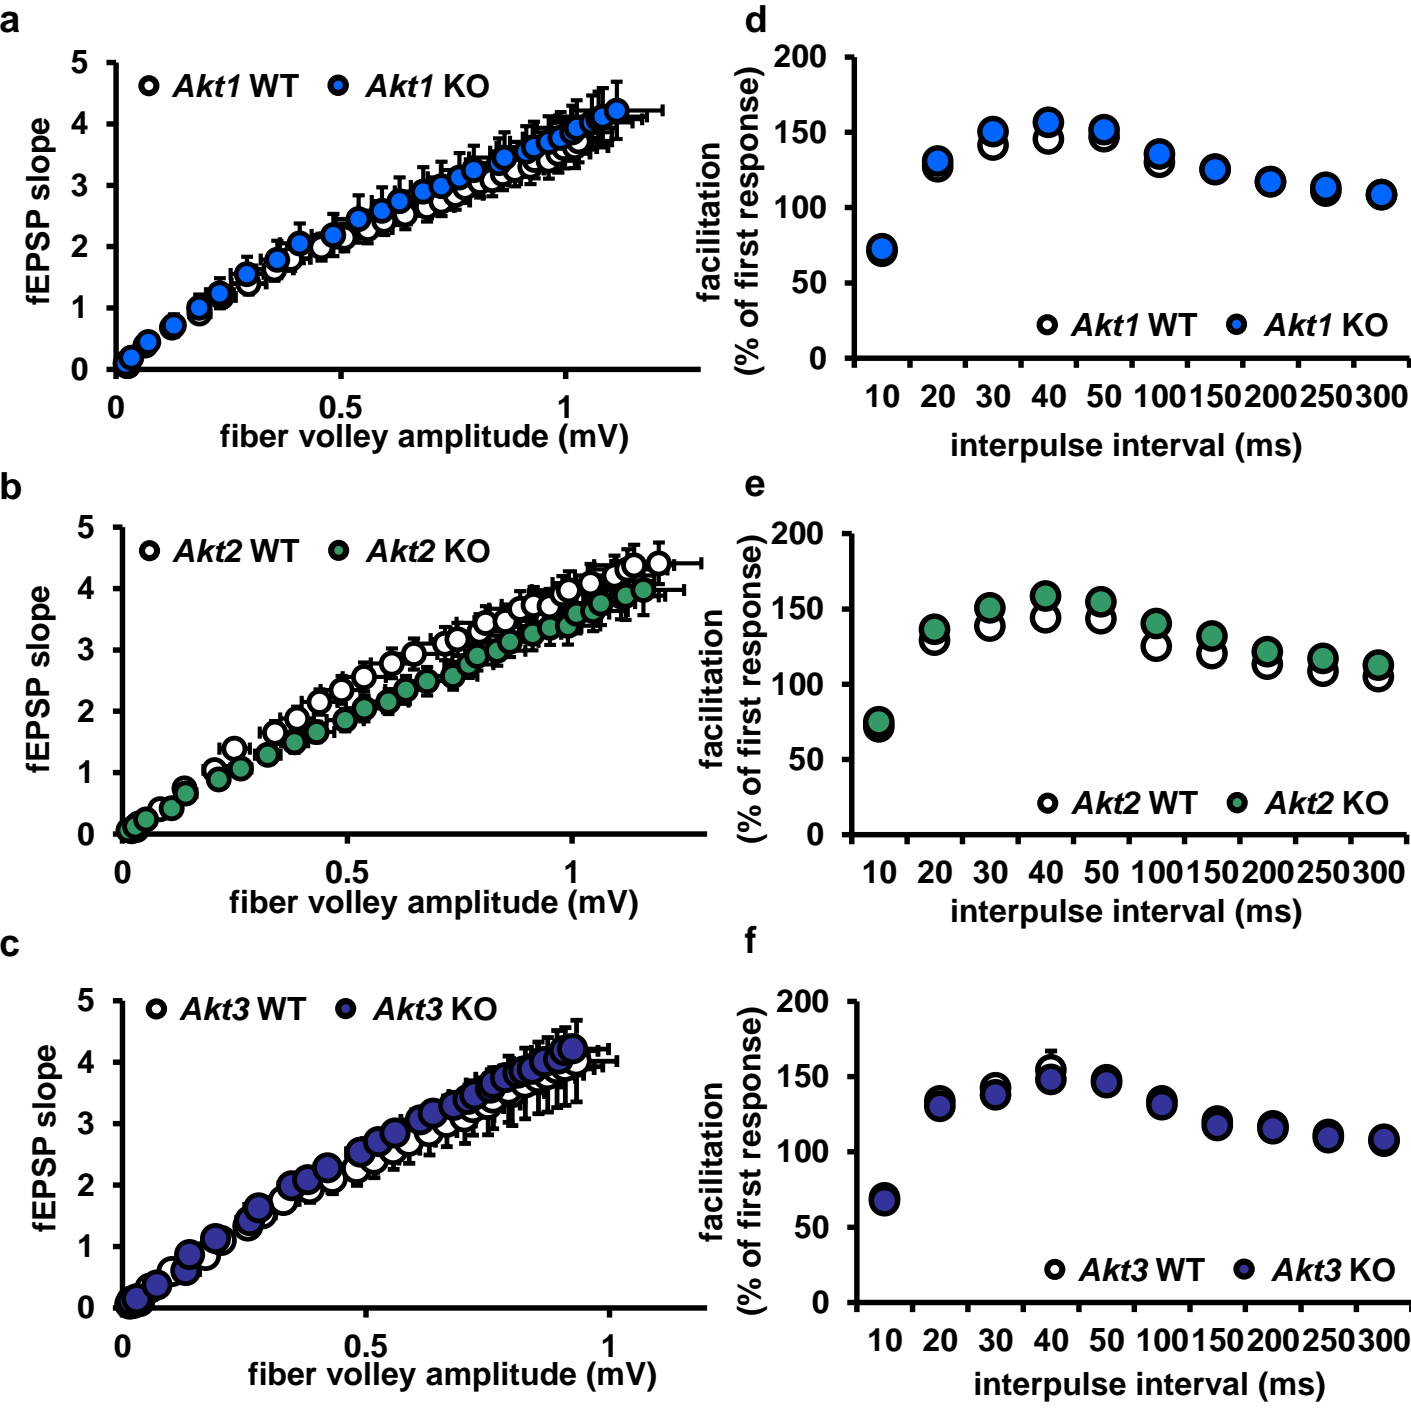

Supplement: supp [file elife-30640-supp-v1.zip]

Figure 8 – figure supplement 1

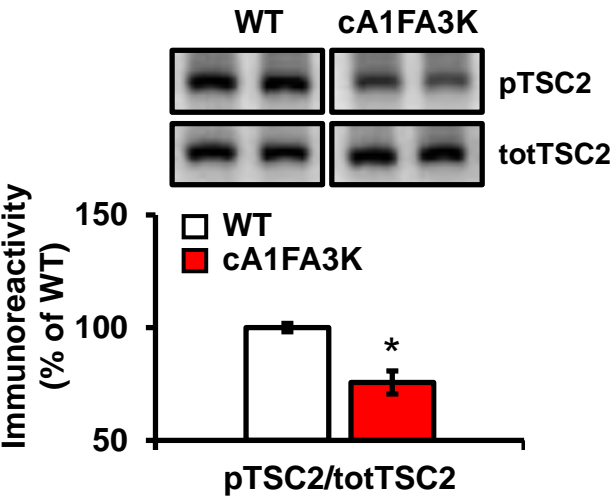

Supplement: supp [file elife-30640-supp-v1.zip]

Figure 4 – figure supplement 3

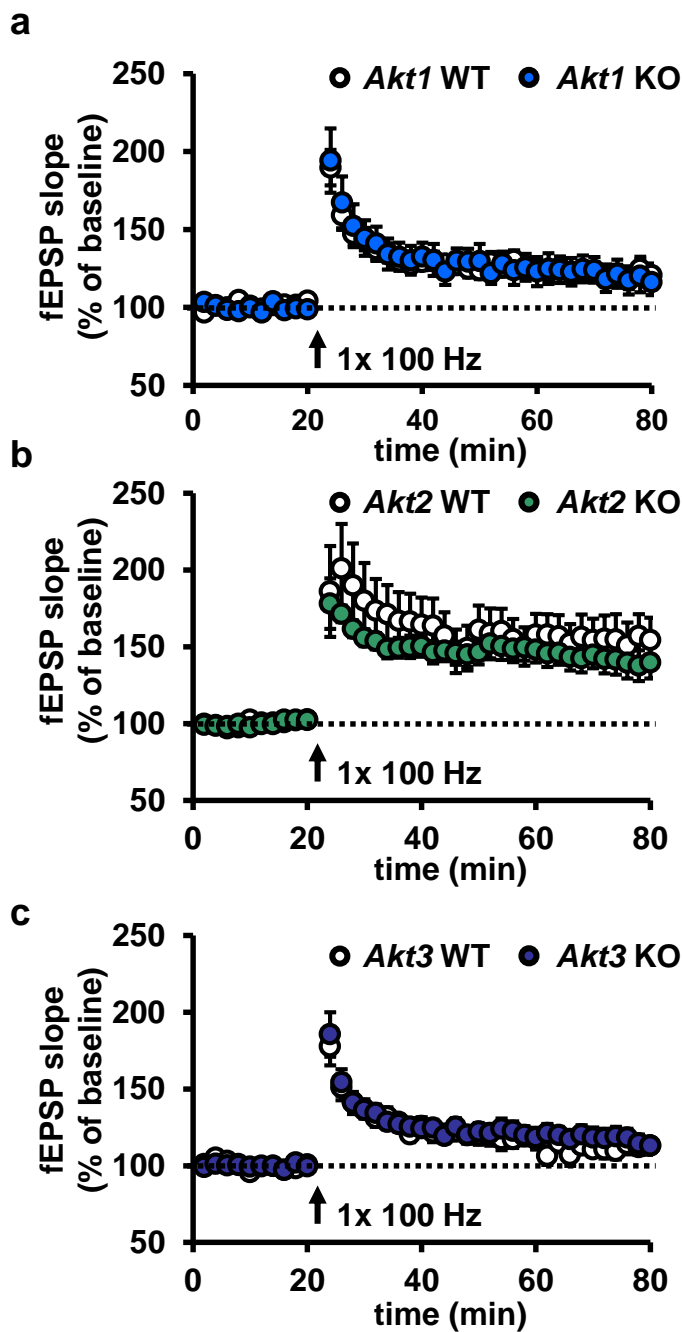

Supplement: supp [file elife-30640-supp-v1.zip]

Figure 3 – figure supplement 1

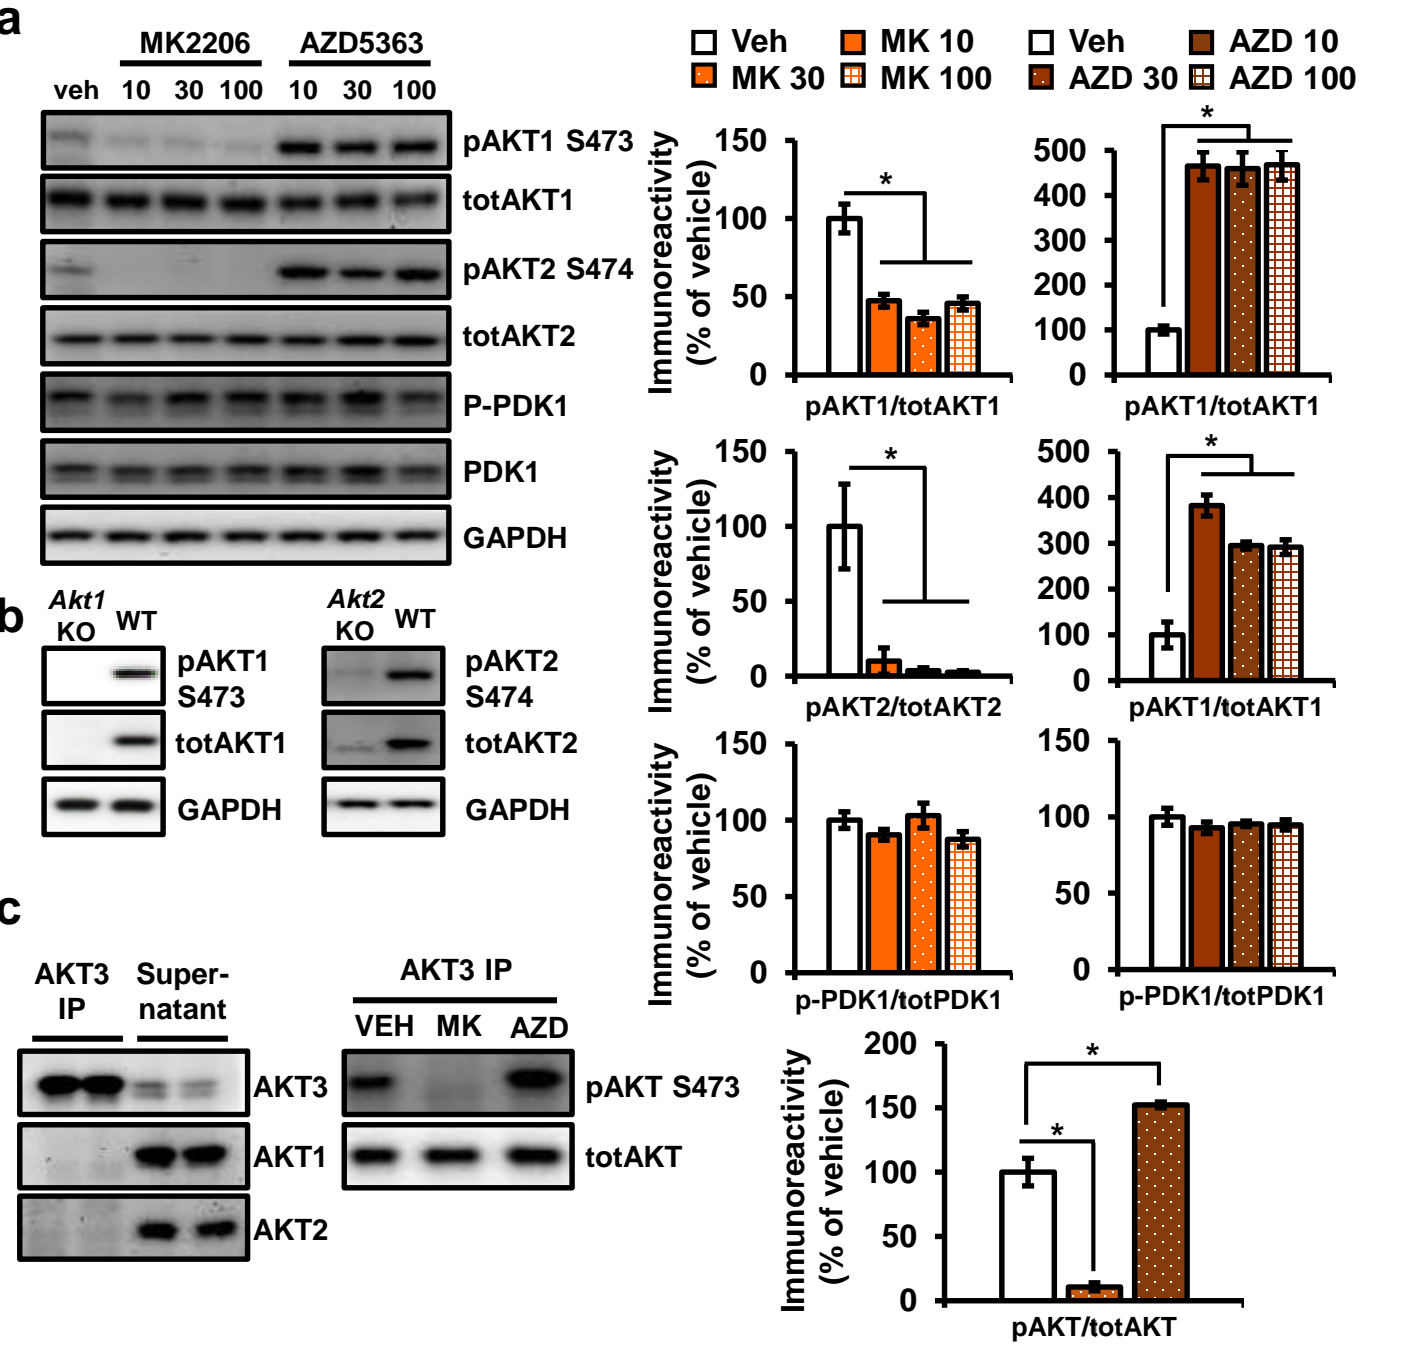

Supplement: supp [file elife-30640-supp-v1.zip]

Figure 4 – figure supplement 1

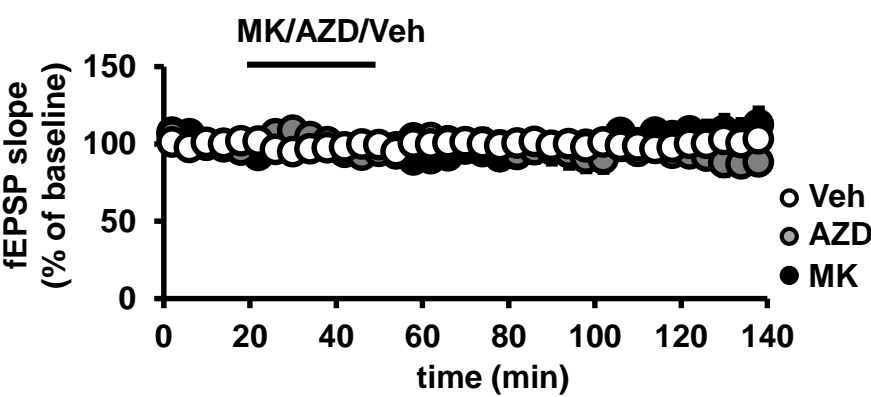

Supplement: supp [file elife-30640-supp-v1.zip]

Figure 4 – figure supplement 4

a

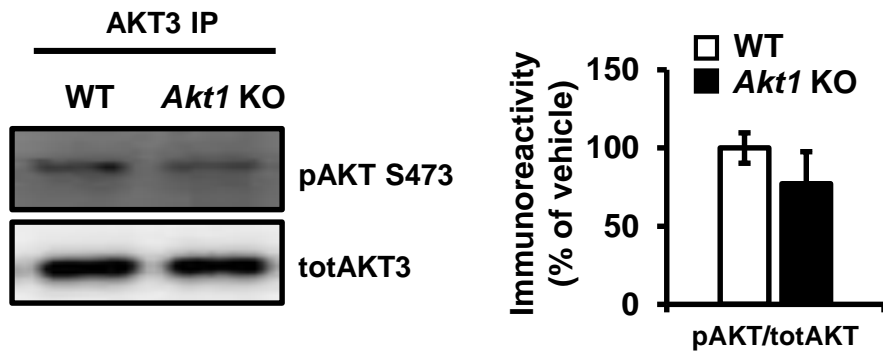

b

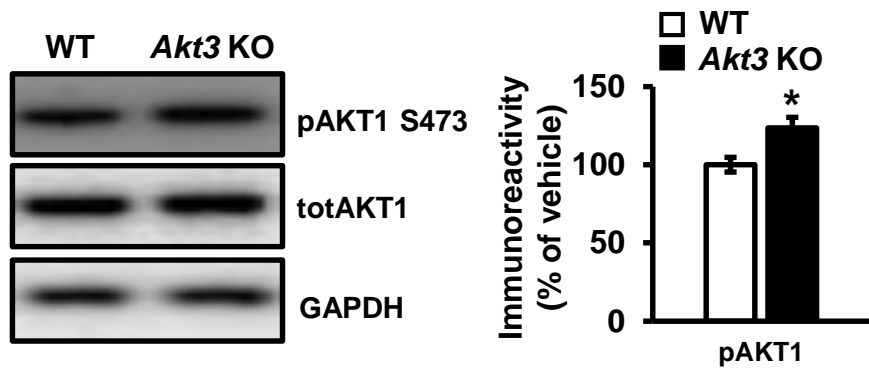

Supplement: supp [file elife-30640-supp-v1.zip]
